# Supplementary material for: Mimivirus relatives in the Sargasso sea
Source: PubMed Central journal article supplement (PMC1215527; doi:10.1186/1743-422x-2-62), 2005-08-16
Supplement: 1743-422X-2-62-S1.pdf [file 1743-422X-2-62-S1.pdf]

# **Mimivirus Relatives in the Sargasso Sea**

Elodie Ghedin

Jean-Michel Claverie

**List of Mimivirus ORFs exhibiting a best match in the env-nr database**



| <b>Mimi ORF</b> | <b>Best Env-nr Match ID</b> |          |    |            | <b>Score</b> | <b>E-value</b> | <b>Best nr Match ID</b> |          |     |               | <b>Score</b> | <b>E-value</b> |
|-----------------|-----------------------------|----------|----|------------|--------------|----------------|-------------------------|----------|-----|---------------|--------------|----------------|
| L18             | gi                          | 43710841 | gb | EAF10508.1 | 137.1        | 4.7e-31        | gi                      | 51244078 | ref | YP_063962.1   | 106.7        | 2.7e-21        |
| L25             | gi                          | 42923128 | gb | EAB28610.1 | 169.1        | 5e-41          | gi                      | 34876677 | ref | XP_214012.2   | 163.3        | 1.1e-38        |
| L75             | gi                          | 43124292 | gb | EAC28017.1 | 51.6         | 1.1e-05        | gi                      | 13794513 | gb  | AAK39888.1    | 51.22        | 5.5e-05        |
| L93             | gi                          | 42923128 | gb | EAB28610.1 | 177.9        | 1.6e-43        | gi                      | 40740451 | gb  | EAA59641.1    | 156.8        | 1.5e-36        |
| L100            | gi                          | 42923128 | gb | EAB28610.1 | 119          | 1.4e-25        | gi                      | 40740451 | gb  | EAA59641.1    | 117.9        | 1.2e-24        |
| L102            | gi                          | 44215848 | gb | EAH75003.1 | 46.98        | 0.00017        | gi                      | 19703853 | ref | NP_603415.1   | 41.2         | 0.035          |
| R106            | gi                          | 43776260 | gb | EAF42614.1 | 139          | 8.1e-32        | gi                      | 37676542 | ref | NP_936938.1   | 107.1        | 1.4e-21        |
| L111            | gi                          | 43296731 | gb | EAD14168.1 | 46.21        | 0.0006         | gi                      | 16805307 | ref | NP_473335.1   | 41.2         | 0.077          |
| L113            | gi                          | 43770287 | gb | EAF39597.1 | 50.45        | 8.8e-06        | gi                      | 23498951 | emb | CAD51029.1    | 43.9         | 0.003          |
| R118            | gi                          | 44281621 | gb | EAI17665.1 | 187.6        | 1.6e-46        | gi                      | 56965351 | ref | YP_177083.1   | 43.51        | 0.014          |
| R132            | gi                          | 42849963 | gb | EAA92307.1 | 98.6         | 4.3e-20        | gi                      | 33864966 | ref | NP_896525.1   | 61.62        | 2.1e-08        |
| R135            | gi                          | 44399015 | gb | EAI99687.1 | 99.37        | 1.4e-19        | gi                      | 48769830 | ref | ZP_00274174.1 | 97.06        | 2.7e-18        |
| L136            | gi                          | 43375980 | gb | EAD52870.1 | 211.5        | 9.9e-54        | gi                      | 56708496 | ref | YP_170392.1   | 107.5        | 7.9e-22        |
| R139            | gi                          | 42931622 | gb | EAB32840.1 | 57           | 1.8e-07        | gi                      | 30409752 | gb  | AAP32727.1    | 55.45        | 2e-06          |
| L143            | gi                          | 43788785 | gb | EAF48931.1 | 101.7        | 8e-21          | gi                      | 54031509 | ref | ZP_00363643.1 | 53.91        | 7.4e-06        |
| L174            | gi                          | 43709436 | gb | EAF09806.1 | 48.52        | 0.0001         | gi                      | 13358136 | ref | NP_078410.1   | 45.44        | 0.003          |
| L177            | gi                          | 43660484 | gb | EAE85189.1 | 47.75        | 0.00021        | gi                      | 56526423 | emb | CAH77752.1    | 44.67        | 0.007          |
| L193            | gi                          | 43116621 | gb | EAC24307.1 | 138.7        | 1.7e-31        | gi                      | 59889773 | emb | CAH19128.1    | 110.2        | 2.6e-22        |
| L206            | gi                          | 44511459 | gb | EAJ77190.1 | 210.7        | 2e-53          | gi                      | 13358409 | ref | NP_078717.1   | 163.7        | 1.1e-38        |
| L207            | gi                          | 43582640 | gb | EAE46140.1 | 115.2        | 1.9e-24        | gi                      | 13358409 | ref | NP_078717.1   | 101.3        | 1.1e-19        |
| L208            | gi                          | 43154232 | gb | EAC42788.1 | 54.3         | 6.8e-07        | gi                      | 23509124 | ref | NP_701792.1   | 44.67        | 0.002          |
| L215            | gi                          | 43198765 | gb | EAC64922.1 | 45.44        | 9.8e-05        | gi                      | 30249486 | ref | NP_841556.1   | 43.9         | 0.001          |
| R240            | gi                          | 43054398 | gb | EAB93597.1 | 83.57        | 9.3e-15        |                         |          |     |               |              |                |
| L250            | gi                          | 43527692 | gb | EAE18541.1 | 133.7        | 3.8e-30        | gi                      | 17136758 | ref | NP_476888.1   | 121.3        | 7.9e-26        |
| L251            | gi                          | 44049491 | gb | EAG84927.1 | 263.5        | 8.5e-69        | gi                      | 13357908 | ref | NP_078182.1   | 251.5        | 1.4e-64        |
| R267            | gi                          | 42923128 | gb | EAB28610.1 | 114          | 2.9e-24        | gi                      | 40740517 | gb  | EAA59707.1    | 111.7        | 5.7e-23        |
| L279            | gi                          | 42977843 | gb | EAB55869.1 | 46.21        | 0.00082        | gi                      | 23508131 | ref | NP_700801.1   | 45.05        | 0.007          |
| R296            | gi                          | 44416870 | gb | EAJ11899.1 | 138.7        | 6.8e-32        | gi                      | 48845024 | ref | ZP_00299314.1 | 132.9        | 1.5e-29        |
| R299            | gi                          | 43651599 | gb | EAE80654.1 | 82.42        | 3.4e-15        | gi                      | 46440930 | gb  | EAL00231.1    | 80.88        | 3.7e-14        |
| L300            | gi                          | 44143264 | gb | EAH36242.1 | 59.31        | 1.5e-08        | gi                      | 50292185 | ref | XP_448525.1   | 54.3         | 1.7e-06        |
| R301            | gi                          | 42942338 | gb | EAB38176.1 | 64.7         | 1.8e-09        | gi                      | 15042460 | gb  | AAK82240.1    | 48.14        | 0.00068        |
| L315            | gi                          | 42953235 | gb | EAB43598.1 | 88.97        | 5.4e-17        | gi                      | 56964473 | ref | YP_176204.1   | 70.86        | 5.9e-11        |

|      |    |          |    |            |       |         |    |          |     |               |  |       |         |
|------|----|----------|----|------------|-------|---------|----|----------|-----|---------------|--|-------|---------|
| L318 | gi | 44268792 | gb | EAI09019.1 | 214.2 | 1.5e-54 | gi | 33416901 | gb  | AAH55597.1    |  | 160.2 | 1e-37   |
| L320 | gi | 43010993 | gb | EAB72269.1 | 101.3 | 8.6e-21 | gi | 30691953 | ref | NP_174343.2   |  | 67.01 | 6.9e-10 |
| R322 | gi | 44500797 | gb | EAJ70042.1 | 230.7 | 1.1e-58 | gi | 1655695  | emb | CAA93738.1    |  | 160.2 | 7.5e-37 |
| R325 | gi | 42880571 | gb | EAB07497.1 | 98.6  | 3.4e-20 | gi | 2738426  | gb  | AAB94453.1    |  | 58.15 | 1.8e-07 |
| R339 | gi | 43154902 | gb | EAC43116.1 | 60.46 | 7.5e-09 | gi | 17136888 | ref | NP_476967.1   |  | 58.92 | 7.6e-08 |
| R341 | gi | 42929462 | gb | EAB31721.1 | 122.1 | 1.6e-26 | gi | 9628175  | ref | NP_042761.1   |  | 72.02 | 7.5e-11 |
| R343 | gi | 43750296 | gb | EAF29561.1 | 131.3 | 2.3e-29 | gi | 30021937 | ref | NP_833568.1   |  | 129   | 4.6e-28 |
| R354 | gi | 43821272 | gb | EAF65062.1 | 154.1 | 3.4e-36 | gi | 9631735  | ref | NP_048514.1   |  | 68.94 | 5.8e-10 |
| R355 | gi | 43665722 | gb | EAE87837.1 | 121.3 | 1.1e-26 | gi | 450711   | emb | CAA50819.1    |  | 52.37 | 2.4e-05 |
| L364 | gi | 42987215 | gb | EAB60545.1 | 72.02 | 1.7e-11 | gi | 4049749  | gb  | AAC97709.1    |  | 63.54 | 2.4e-08 |
| R366 | gi | 43171483 | gb | EAC51308.1 | 255   | 5.5e-66 | gi | 50302815 | ref | XP_451344.1   |  | 144.1 | 5.6e-32 |
| R368 | gi | 43105861 | gb | EAC18976.1 | 113.6 | 4.3e-25 | gi | 13177431 | gb  | AAK14575.1    |  | 73.94 | 1.1e-12 |
| L371 | gi | 42973284 | gb | EAB53609.1 | 113.6 | 7.7e-24 | gi | 40556241 | ref | NP_955326.1   |  | 109.8 | 4.5e-22 |
| L374 | gi | 43006294 | gb | EAB69978.1 | 58.15 | 6.6e-08 | gi | 49528793 | emb | CAG62455.1    |  | 37.35 | 0.452   |
| L375 | gi | 44363842 | gb | EAI74667.1 | 131.3 | 1.3e-29 | gi | 450699   | emb | CAA50807.1    |  | 72.4  | 2.9e-11 |
| L377 | gi | 43715140 | gb | EAF12631.1 | 141.7 | 4.2e-32 | gi | 37722439 | gb  | AAP33184.1    |  | 127.9 | 2.6e-27 |
| R378 | gi | 43174352 | gb | EAC52755.1 | 53.53 | 1.2e-06 | gi | 56489446 | emb | CAI03544.1    |  | 49.68 | 6.4e-05 |
| R382 | gi | 44465210 | gb | EAJ45951.1 | 166   | 2.1e-39 | gi | 6319713  | ref | NP_009795.1   |  | 85.89 | 1.2e-14 |
| R383 | gi | 43262281 | gb | EAC96836.1 | 69.32 | 6e-11   | gi | 17137638 | ref | NP_477413.1   |  | 51.6  | 5.1e-05 |
| L388 | gi | 44253396 | gb | EAH98417.1 | 77.8  | 1.1e-13 | gi | 56961986 | ref | YP_173708.1   |  | 75.48 | 2.1e-12 |
| L396 | gi | 43615322 | gb | EAE62377.1 | 173.3 | 5.1e-42 | gi | 13177345 | gb  | AAK14489.1    |  | 167.5 | 1.1e-39 |
| R398 | gi | 43115033 | gb | EAC23498.1 | 120.6 | 1.3e-26 | gi | 46226486 | gb  | EAK87480.1    |  | 62.39 | 1.7e-08 |
| R409 | gi | 43205815 | gb | EAC68464.1 | 52.37 | 2.4e-06 | gi | 37725924 | gb  | AAO38040.1    |  | 38.89 | 0.097   |
| R411 | gi | 43523940 | gb | EAE16653.1 | 78.57 | 1.8e-13 | gi | 3116125  | emb | CAA18875.1    |  | 77.8  | 1.2e-12 |
| L417 | gi | 44253353 | gb | EAH98387.1 | 102.1 | 1.3e-20 | gi | 9632055  | ref | NP_048844.1   |  | 59.31 | 4e-07   |
| R418 | gi | 44628310 | gb | EAK59119.1 | 122.9 | 4.8e-28 | gi | 11498373 | ref | NP_069601.1   |  | 121.3 | 5.8e-27 |
| L425 | gi | 44004806 | gb | EAG60442.1 | 142.5 | 8e-33   | gi | 4587052  | dbj | BAA76601.1    |  | 119.8 | 2.2e-25 |
| L426 | gi | 43035635 | gb | EAB84418.1 | 68.55 | 5e-11   | gi | 46241679 | gb  | AAS83064.1    |  | 63.16 | 7.8e-09 |
| R429 | gi | 43593604 | gb | EAE51661.1 | 216.5 | 4.1e-55 | gi | 9632061  | ref | NP_048850.1   |  | 152.5 | 2.9e-35 |
| R430 | gi | 42973834 | gb | EAB53885.1 | 53.91 | 1.6e-06 | gi | 9632061  | ref | NP_048850.1   |  | 46.21 | 0.001   |
| L432 | gi | 44173673 | gb | EAH52299.1 | 151.4 | 5.4e-36 | gi | 48730983 | ref | ZP_00264729.1 |  | 146.4 | 6.6e-34 |
| R435 | gi | 43287470 | gb | EAD09576.1 | 66.63 | 4.8e-10 | gi | 23481897 | gb  | EAA18039.1    |  | 48.52 | 0.00054 |
| L437 | gi | 44215544 | gb | EAH74836.1 | 177.6 | 1.1e-43 | gi | 16151622 | dbj | BAB69884.1    |  | 157.1 | 6.1e-37 |
| R439 | gi | 43111515 | gb | EAC21807.1 | 173.7 | 4.6e-42 | gi | 4587052  | dbj | BAA76601.1    |  | 164.5 | 1.1e-38 |
| R440 | gi | 43011410 | gb | EAB72486.1 | 90.12 | 2.9e-16 | gi | 23510178 | ref | NP_702844.1   |  | 78.95 | 2.7e-12 |
| R441 | gi | 43269509 | gb | EAD00518.1 | 209.9 | 4.8e-53 | gi | 3341805  | gb  | AAC27492.1    |  | 137.9 | 9.4e-31 |
| R443 | gi | 44226821 | gb | EAH81210.1 | 63.16 | 1e-09   | gi | 56470459 | gb  | EAL48116.1    |  | 52.37 | 6e-06   |
| R445 | gi | 43027882 | gb | EAB80631.1 | 50.06 | 4.1e-05 | gi | 34397716 | gb  | AAQ66777.1    |  | 48.14 | 0.00061 |

|      |    |          |    |            |       |         |    |          |     |               |       |         |
|------|----|----------|----|------------|-------|---------|----|----------|-----|---------------|-------|---------|
| L446 | gi | 42912213 | gb | EAB23180.1 | 95.52 | 7.2e-19 | gi | 47569527 | ref | ZP_00240206.1 | 84.73 | 5e-15   |
| R447 | gi | 43125924 | gb | EAC28806.1 | 60.46 | 2.9e-09 | gi | 9632052  | ref | NP_048841.1   | 46.98 | 0.00014 |
| R449 | gi | 43476579 | gb | EAD93014.1 | 122.9 | 1.1e-26 | gi | 13177377 | gb  | AAK14521.1    | 62.39 | 6.9e-08 |
| R450 | gi | 42883300 | gb | EAB08831.1 | 48.91 | 8.6e-05 | gi | 38683713 | gb  | AAR26889.1    | 40.05 | 0.157   |
| L451 | gi | 44145880 | gb | EAH37686.1 | 51.22 | 2.2e-05 | gi | 23612730 | ref | NP_704269.1   | 45.82 | 0.004   |
| R453 | gi | 43138976 | gb | EAC35259.1 | 74.33 | 2e-12   | gi | 23481840 | gb  | EAA17997.1    | 51.99 | 4.2e-05 |
| L454 | gi | 43184473 | gb | EAC57805.1 | 72.79 | 2.7e-11 | gi | 16805082 | ref | NP_473111.1   | 70.09 | 7.1e-10 |
| R468 | gi | 43479103 | gb | EAD94286.1 | 46.98 | 0.00017 |    |          |     |               |       |         |
| L471 | gi | 44521596 | gb | EAJ83983.1 | 48.91 | 0.0001  | gi | 23510142 | ref | NP_702808.1   | 44.67 | 0.008   |
| R472 | gi | 43137277 | gb | EAC34419.1 | 111.7 | 7.2e-23 | gi | 33414605 | gb  | AAL38220.2    | 63.54 | 9.3e-08 |
| L479 | gi | 44350833 | gb | EAI65324.1 | 82.03 | 5.2e-15 | gi | 52788091 | ref | YP_093919.1   | 70.48 | 6e-11   |
| L483 | gi | 42923128 | gb | EAB28610.1 | 161   | 1.9e-38 | gi | 42555731 | gb  | EAA78537.1    | 157.5 | 8.3e-37 |
| L485 | gi | 44073294 | gb | EAG98118.1 | 48.52 | 2.8e-05 | gi | 23509456 | ref | NP_702123.1   | 41.2  | 0.015   |
| R489 | gi | 43155682 | gb | EAC43508.1 | 67.78 | 8e-11   | gi | 9631920  | ref | NP_048709.1   | 47.75 | 0.00032 |
| L491 | gi | 44049493 | gb | EAG84928.1 | 61.62 | 7.8e-09 | gi | 56473336 | gb  | EAL50770.1    | 48.52 | 0.00026 |
| R493 | gi | 43155685 | gb | EAC43510.1 | 153.3 | 4.7e-36 | gi | 18726    | emb | CAA39239.1    | 88.58 | 5.7e-16 |
| L496 | gi | 43924053 | gb | EAG16876.1 | 67.4  | 1.5e-10 | gi | 60468406 | gb  | EAL66411.1    | 51.99 | 2.6e-05 |
| R502 | gi | 44245809 | gb | EAH92811.1 | 46.21 | 0.00033 | gi | 23612359 | ref | NP_703939.1   | 38.12 | 0.343   |
| L504 | gi | 43757624 | gb | EAJ33258.1 | 51.22 | 2.1e-05 | gi | 23619172 | ref | NP_705134.1   | 40.05 | 0.192   |
| L507 | gi | 44275242 | gb | EAI13417.1 | 99.37 | 3.3e-20 | gi | 9632038  | ref | NP_048827.1   | 88.97 | 1.7e-16 |
| R508 | gi | 43850909 | gb | EAJ79670.1 | 70.09 | 3.3e-11 | gi | 46440772 | gb  | EAL00074.1    | 43.9  | 0.01    |
| R512 | gi | 43084896 | gb | EAC08655.1 | 107.8 | 5.3e-23 | gi | 34333239 | gb  | AAQ64394.1    | 68.55 | 1.3e-10 |
| L539 | gi | 44612196 | gb | EAK47432.1 | 60.08 | 2.5e-08 | gi | 48095940 | ref | XP_394563.1   | 53.91 | 6.9e-06 |
| R555 | gi | 44074387 | gb | EAG98725.1 | 221.1 | 6.6e-56 | gi | 48477311 | ref | YP_023017.1   | 129   | 1.4e-27 |
| R568 | gi | 44444139 | gb | EAJ31047.1 | 82.03 | 2.2e-14 | gi | 42782567 | ref | NP_979814.1   | 78.18 | 1.3e-12 |
| R569 | gi | 43851406 | gb | EAJ79912.1 | 46.59 | 0.00037 | gi | 14247226 | dbj | BAB57617.1    | 42.36 | 0.027   |
| R571 | gi | 42912213 | gb | EAB23180.1 | 103.2 | 2.9e-21 | gi | 54303145 | ref | YP_133138.1   | 87.43 | 6.5e-16 |
| R592 | gi | 43246588 | gb | EAC88951.1 | 70.48 | 8.4e-11 | gi | 19173110 | ref | NP_597661.1   | 67.01 | 3.8e-09 |
| L593 | gi | 44438438 | gb | EAJ27151.1 | 128.3 | 6e-29   | gi | 54029386 | ref | ZP_00361528.1 | 114.4 | 3.4e-24 |
| R595 | gi | 43331658 | gb | EAD31349.1 | 97.44 | 1.6e-19 | gi | 42553185 | gb  | EAA76028.1    | 90.12 | 9.8e-17 |
| R596 | gi | 43382223 | gb | EAD56003.1 | 119.8 | 2.9e-26 | gi | 13177431 | gb  | AAK14575.1    | 104.4 | 5e-21   |
| R604 | gi | 43049485 | gb | EAB91155.1 | 47.37 | 0.00028 | gi | 23484531 | gb  | EAA19833.1    | 44.28 | 0.01    |
| L620 | gi | 42912213 | gb | EAB23180.1 | 57.77 | 2e-07   | gi | 19705025 | ref | NP_602520.1   | 55.45 | 3.9e-06 |
| R640 | gi | 44283592 | gb | EAI18988.1 | 124.8 | 2.1e-27 | gi | 37519905 | ref | NP_923282.1   | 112.8 | 3.4e-23 |
| R648 | gi | 44283592 | gb | EAI18988.1 | 167.5 | 2e-40   | gi | 37519905 | ref | NP_923282.1   | 122.1 | 3.8e-26 |
| R654 | gi | 43291944 | gb | EAD11806.1 | 97.44 | 4.3e-19 | gi | 32263328 | gb  | AAP78373.1    | 84.34 | 1.5e-14 |
| R667 | gi | 43769283 | gb | EAJ39072.1 | 55.07 | 2.1e-07 | gi | 52841308 | ref | YP_095107.1   | 50.83 | 9.6e-06 |
| L687 | gi | 44566182 | gb | EAK15053.1 | 244.6 | 9.5e-64 | gi | 46097173 | gb  | EAK82406.1    | 214.9 | 3.2e-54 |

|      |    |          |    |            |       |         |    |          |     |               |   |       |         |
|------|----|----------|----|------------|-------|---------|----|----------|-----|---------------|---|-------|---------|
| R689 | gi | 44068613 | gb | EAG95539.1 | 150.6 | 1.2e-35 | gi | 24378003 | gb  | AAN59275.1    |   | 144.1 | 4.4e-33 |
| L690 | gi | 44283592 | gb | EAI18988.1 | 152.5 | 6e-36   | gi | 37519905 | ref | NP_923282.1   |   | 104.4 | 7.4e-21 |
| R693 | gi | 43163235 | gb | EAC47212.1 | 119.4 | 8.9e-27 | gi | 49235486 | ref | ZP_00329554.1 |   | 115.5 | 3.2e-25 |
| L716 | gi | 44016225 | gb | EAG66729.1 | 69.32 | 2.4e-11 | gi | 15921096 | ref | NP_376765.1   |   | 66.24 | 7.4e-10 |
| R730 | gi | 44083879 | gb | EAH03977.1 | 199.5 | 4.8e-50 | gi | 6466376  | gb  | AAF12958.1    |   | 123.2 | 1.7e-26 |
| R753 | gi | 43500977 | gb | EAE05248.1 | 85.89 | 1.7e-15 | gi | 46447199 | ref | YP_008564.1   |   | 71.25 | 1.7e-10 |
| R757 | gi | 43500977 | gb | EAE05248.1 | 73.17 | 9.5e-12 | gi | 46447096 | ref | YP_008461.1   |   | 65.86 | 6.2e-09 |
| R758 | gi | 44662698 | gb | EAK80724.1 | 54.68 | 4.7e-07 | gi | 50755591 | ref | XP_414809.1   |   | 51.22 | 1.9e-05 |
| R760 | gi | 43408903 | gb | EAD65356.1 | 97.44 | 3.4e-19 | gi | 20521133 | dbj | BAA31672.2    |   | 96.67 | 2.3e-18 |
| R777 | gi | 42923128 | gb | EAB28610.1 | 95.52 | 6.3e-19 | gi | 18676694 | dbj | BAB84999.1    |   | 90.89 | 6.1e-17 |
| L780 | gi | 43372155 | gb | EAD50923.1 | 280.4 | 1.3e-74 | gi | 56472969 | gb  | EAL50422.1    |   | 237.7 | 3.7e-61 |
| R791 | gi | 43884722 | gb | EAJ96312.1 | 79.72 | 3.3e-14 | gi | 32419933 | ref | XP_330410.1   |   | 78.95 | 2.2e-13 |
| R802 | gi | 44389434 | gb | EAI92933.1 | 59.69 | 2.7e-08 | gi | 25010522 | ref | NP_734917.1   |   | 57.77 | 3.9e-07 |
| R815 | gi | 44467483 | gb | EAJ47513.1 | 109.4 | 9.5e-23 | gi | 52841586 | ref | YP_095385.1   |   | 107.8 | 1.1e-21 |
| R832 | gi | 44335875 | gb | EAI54742.1 | 123.2 | 4.5e-27 | gi | 13475556 | ref | NP_107120.1   |   | 112.5 | 3.1e-23 |
| R835 | gi | 43881322 | gb | EAJ94645.1 | 87.43 | 1.8e-16 | gi | 24646968 | ref | NP_650415.1   |   | 84.34 | 5.8e-15 |
| R837 | gi | 44398294 | gb | EAI99192.1 | 86.27 | 1e-15   | gi | 1845265  | gb  | AAB47805.1    |   | 84.73 | 1.2e-14 |
| R843 | gi | 44554385 | gb | EAK06651.1 | 53.53 | 2.9e-06 |    |          |     |               |   |       |         |
| R844 | gi | 43318044 | gb | EAD24737.1 | 83.57 | 1.3e-15 | gi | 53730512 | ref | ZP_00151259.2 |   | 76.64 | 6e-13   |
| R846 | gi | 43713504 | gb | EAJ11838.1 | 61.23 | 4.2e-09 | gi | 47214900 | emb | CAG01031.1    |   | 60.46 | 2.5e-08 |
| R847 | gi | 44398294 | gb | EAI99192.1 | 74.71 | 2.4e-13 | gi | 28373837 | pdb | 1NOR          | A | 71.63 | 5.2e-12 |
| R848 | gi | 42923128 | gb | EAB28610.1 | 110.5 | 1.5e-23 | gi | 58699292 | ref | ZP_00374082.1 |   | 98.98 | 1.7e-19 |
| R850 | gi | 43710841 | gb | EAJ10508.1 | 65.86 | 1.1e-09 | gi | 48834353 | ref | ZP_00291368.1 |   | 63.16 | 3e-08   |
| R852 | gi | 43536538 | gb | EAE22952.1 | 115.9 | 2e-25   | gi | 33860982 | ref | NP_892543.1   |   | 99.37 | 7e-20   |
| R853 | gi | 43166050 | gb | EAC48610.1 | 108.2 | 1.2e-23 | gi | 33860982 | ref | NP_892543.1   |   | 86.27 | 2.1e-16 |
| R855 | gi | 44585905 | gb | EAK28804.1 | 120.6 | 2.4e-27 | gi | 33860982 | ref | NP_892543.1   |   | 101.3 | 6.2e-21 |
| R877 | gi | 43313336 | gb | EAD22405.1 | 95.13 | 2.6e-19 | gi | 26990735 | ref | NP_746160.1   |   | 94.74 | 1.2e-18 |
| L893 | gi | 44629372 | gb | EAK59899.1 | 62.77 | 1e-09   | gi | 57101548 | ref | XP_541839.1   |   | 59.31 | 2.7e-08 |
| L894 | gi | 44600496 | gb | EAK39086.1 | 109.4 | 7.2e-23 | gi | 45684031 | ref | ZP_00195462.1 |   | 93.59 | 1.6e-17 |
| R901 | gi | 42923128 | gb | EAB28610.1 | 162.5 | 5.5e-39 | gi | 42555731 | gb  | EAA78537.1    |   | 157.1 | 9.1e-37 |
